# Top predators govern multitrophic diversity effects in tritrophic food webs

Ruben Ceulemans<sup>1</sup>, Christian Guill<sup>1</sup> & Ursula Gaedke<sup>1</sup>

<sup>1</sup> University of Potsdam, Germany

## Abstract

It is well known that functional diversity strongly affects ecosystem functioning. However, even in rather simple model communities consisting of only two or, at best, three trophic levels, the relationship between multitrophic functional diversity and ecosystem functioning appears difficult to generalize, due to its high contextuality. In this study, we considered several differently structured tritrophic food webs, in which the amount of functional diversity was varied independently on each trophic level. To achieve generalizable results, largely independent of parametrization, we examined the outcomes of 128,000 parameter combinations sampled from ecologically plausible intervals, with each tested for 200 randomly sampled initial conditions. Analysis of our data was done by training a Random Forest model. This method enables the identification of complex patterns in the data through partial dependence graphs, and the comparison of the relative influence of model parameters, including the degree of diversity, on food web properties. We found that the effects of functional diversity on any trophic level are intimately linked to the amount of diversity on other trophic levels, which may explain the difficulty in unifying results from previous studies. Strikingly, with high diversity throughout the whole food web, different interactions synergize to ensure efficient exploitation of the available nutrients and efficient biomass transfer, ultimately leading to a high biomass and production on the top level. The temporal variation of biomass showed a more complex pattern with increasing multitrophic diversity: while the system initially became less variable, eventually the temporal variation rose again due to the increasingly complex dynamical patterns. Importantly, top diversity and food web parameters affecting the top level were of highest importance to determine the biomass and temporal variability of any trophic level. Therefore, given its high ecological importance and vulnerability to global change, it is essential to preserve diversity on the top trophic level.

## Introduction

In the face of rapid global biodiversity loss (Pimm et al., 2014), investigating the influence of biodiversity on ecosystem functioning is a highly important area of research. It has become clear that biodiversity is a predominant factor in determining relevant functions of ecosystems such as biomass production, resource use efficiency, and stability (Hooper et al., 2005; Tilman et al., 2006; Worm et al., 2006). A major factor affecting the link between biodiversity and these ecosystem functions is functional diversity, i.e., the range

of differences between the functions of species contained within the ecosystem (Petchey and Gaston, 2006).

Mechanistically motivated studies into the role of functional diversity have mainly been performed in the context of simple communities consisting only of one or, at best, two trophic levels. Many of these studies restricted their focus to primary producer diversity, and were able to show its correlation with relevant ecosystem functions (reviewed by Cardinale et al. (2011)). However, during the last two decades, more sophisticated theoretical and experimental studies linking both plant and consumer diversity to these ecosystem functions were conducted (see Tirok and Gaedke (2010); Borer et al. (2012); Filip et al. (2014); Klauschies et al. (2016); Schneider et al. (2016); Flöder et al. (2018), and reviews by Duffy et al. (2007) and Griffin et al. (2013)). In a recent experimental study, Wohlgemuth et al. (2017) demonstrated that producer diversity effects on the biomass distribution and production at higher trophic levels crucially depends on particular traits of the consumer level, such as specialisation and selectivity. Such studies highlight how the links between multitrophic functional diversity and ecosystem functioning are difficult to generalize, due to their high contextuality. The specific food webs that are studied, and the theoretical models used to study them, are often too different to enable meaningful attempt at syntheses of their findings.

For this reason there is a clear need to understand the effects of diversity on ecosystem functions in a setting that is as general and context-free as possible. In addition, the high degree of interplay already observed between diversity on the primary producer and herbivore consumer level underlines the importance of including diversity on even higher trophic levels. In this study, we want to advance our understanding of how functional diversity affects ecosystem functioning in model communities by including a diverse third trophic level. While it has often been highlighted how important the effects of the third trophic level on ecosystem functions are (Bruno and O'Connor, 2005; Duffy et al., 2007; Daam et al., 2019; Abdala-Roberts et al., 2019; Ehrlich and Gaedke, 2020), relatively few studies have attempted to explicitly take these effects into account. Ceulemans et al. (2019) showed that functional diversity increases the biomass production, temporal stability, and biomass transfer efficiency to higher trophic levels of a tritrophic food web, when diversity is increased simultaneously at all three trophic levels. This model analyzed one particular food web structure in detail, which raises the question whether the observed trends are to be expected in general, or whether they are context-dependent as well. Our study tackles this issue by investigating several different tritrophic food web configurations with respect to the same ecosystem functions. Such a method has been applied successfully in the past (Gilman et al., 2010; Kovach-Orr and Fussmann, 2013), but this study is the first to explicitly incorporate a potentially diverse third trophic level in the comparisons. We investigated eight different food web configurations (Figure 1), which differ in the trophic location at which functional diversity may be present. For each of these eight food webs, the amount of functional diversity on the relevant trophic levels varied independently. We measured functional diversity on a trophic level by the difference between the functional traits of the two species residing there: when the trait difference between the species is large, so is the functional diversity, and vice-versa. In this way, we were able to change the functional diversity of a trophic level without changing the number of species.

Importantly, food web dynamics do not only depend on the topology of the food web, but also on the specific parametrization used, regarding both external environmental parameters as well as internal parameters such as growth rates, attacks rates, and handling

times. To sufficiently capture the potentially high variation in biomass dynamics, we randomly selected 128,000 parameter values from ecologically plausible intervals for each of the eight different food webs, as well as tested 200 initial conditions per parameter combination. This procedure allows us to obtain results of high generality, as they apply to the average behavior of tritrophic systems, independent of its parametrization. Analysis and presentation of our results was made possible by training a Random Forest Model on our dataset.

## Methods

The numerical data used in our study was obtained by storing the mean biomasses and coefficients of variation (*CVs*) of the following ordinary differential equation model:

$$\begin{cases} \dot{N} &= \delta(N_0 - N) - \frac{c_N}{c_C} \sum_i r_i B_i \\ \dot{B}_i &= r_i B_i - \sum_j g_{ji} I_j - d_{B_i} B_i \\ \dot{I}_i &= e \sum_j g_{ij} I_i - \sum_i \gamma_{ji} T_j - d_{I_i} I_i \\ \dot{T}_i &= e \sum_j \gamma_{ij} T_i - d_{T_i} T_i, \end{cases} \quad (1)$$

where the indices  $i, j \in \{1, 2\}$ .  $N$  describes the free inorganic nutrients in the system, with the inflow concentration  $N_0$ , inflow rate  $\delta$ , and nutrient-to-carbon ratio  $\frac{c_N}{c_C}$ . The loss rates  $d_{B_i}$ ,  $d_{I_i}$ , and  $d_{T_i}$  represent losses proportional to the biomass present, such as basal respiration, sedimentation, or wash-out. The basal species'  $B_i$  uptake rate  $r_i$  is described by their maximal growth rate  $r'_i$  and nutrient uptake half-saturation constant  $h_N$ :

$$r_i = r'_i \frac{N}{N + h_N}. \quad (2)$$

The interaction between the intermediate species  $I_i$  and the basal species  $B_j$  is described by a Holling-Type-III functional response which is determined by the attack rate  $a_{ij}$ , handling time  $h_{ij}$  and the Hill exponent  $n$ :

$$g_{ij} = a_{ij} \frac{B_j^n}{\sum_{j'} a_{ij'} h_{ij'} B_{j'}^n + 1}. \quad (3)$$

In the same way, the interaction between top species  $T_i$  and intermediate species  $I_j$  is given by:

$$\gamma_{ij} = \alpha_{ij} \frac{I_j^\nu}{\sum_{j'} \alpha_{ij'} \eta_{ij'} I_{j'}^\nu + 1}, \quad (4)$$

with attack rate  $\alpha_{ij}$ , handling time  $\eta_{ij}$ , and Hill exponent  $\nu$ . Finally,  $d_{B_i}$ ,  $d_{I_i}$  and  $d_{T_i}$  determine the death rates of  $B_i$ ,  $I_i$ , and  $T_i$ , respectively.

## Influence of trait differences on trait parameters

The parameters  $r'_i$ ,  $h_{ij}$ ,  $a_{ij}$ ,  $\eta_{ij}$ ,  $\alpha_{ij}$ , and all death rates are determined by the trait differences  $\Delta_B$ ,  $\Delta_I$ , and  $\Delta_T$ , which each can vary from 0 (the two species at each trophic level

are equal) to 1 (maximal trait differences). As trait differences increase, the species  $B_1$ ,  $I_1$ , and  $T_1$  will be metabolically more active, whereas  $B_2$ ,  $I_2$ , and  $T_2$  will be less active through modifying their maximal feeding rates (which equal the inverse of the handling times  $h_{ij}$  and  $\eta_{ij}$  for the intermediate and top species).

In our model, trait differences affect the relevant species' parameters symmetrically, such that an increase for species 1 leads to a decrease for species 2 by the same factor. Explicitly:

$$\begin{aligned} r'_1 &= r'_0 \cdot B_{\text{inc}} & h_{1i} &\sim \frac{h_0}{I_{\text{inc}}} & \eta_{1i} &\sim \frac{\eta_0}{T_{\text{inc}}} \\ r'_2 &= \frac{r'_0}{B_{\text{inc}}} & h_{2i} &\sim h_0 \cdot I_{\text{inc}} & \eta_{2i} &\sim \eta_0 \cdot T_{\text{inc}}, \end{aligned} \quad (5)$$

with

$$B_{\text{inc}} = 1 + \Delta_B \cdot \tau_{\text{inc}} \quad I_{\text{inc}} = 1 + \Delta_I \cdot \tau_{\text{inc}} \quad T_{\text{inc}} = 1 + \Delta_T \cdot \tau_{\text{inc}}, \quad (6)$$

so that they are unity for  $\Delta_i = 0$ , leaving the species' parameters unaffected, and maximal for  $\Delta_i = 1$ , where  $\tau_{\text{inc}}$  determines their maximal increase. In this text, we fixed  $\tau_{\text{inc}} = 1/2$ .

The universality of trade-offs in natural systems (Kneitel and Chase, 2004; Ehrlich et al., 2017) implies that for any increase or decrease in growth rates, the species' loss rates must change correspondingly. Time and/or energy that is invested towards a certain defense strategy cannot be used for resource uptake, and thus, comes at the cost of a lower growth rate (and thus a higher handling time). Conversely, investing in a higher growth rate (lower handling time) tends to make a species more vulnerable to predation as it leaves less time and/or energy for employing defense strategies. For simplicity, the loss rates are affected in the same way as the growth rates. Thus,  $B_{\text{inc}}$  affects the handling times  $h_{ij}$  as well as the death rates  $d_{B_i}$ ,  $I_{\text{inc}}$  affects  $\eta_{ij}$  and  $d_{I_i}$ , and  $T_{\text{inc}}$  affects  $d_{T_i}$ , in the following way:

$$\begin{aligned} h_{i1} &\sim \frac{h_0}{B_{\text{inc}}} & \eta_{i1} &\sim \frac{\eta_0}{I_{\text{inc}}} \\ h_{i2} &\sim h_0 \cdot B_{\text{inc}} & \eta_{i2} &\sim \eta_0 \cdot I_{\text{inc}}, \end{aligned} \quad (7)$$

and,

$$\begin{aligned} d_{B_1} &= \delta \cdot B_{\text{inc}} & d_{I_1} &= \delta \cdot I_{\text{inc}} & d_{T_1} &= \delta \cdot T_{\text{inc}} \\ d_{B_2} &= \frac{\delta}{B_{\text{inc}}} & d_{I_2} &= \frac{\delta}{I_{\text{inc}}} & d_{T_2} &= \frac{\delta}{T_{\text{inc}}} \end{aligned} \quad (8)$$

The handling times  $h_{ij}$  and  $\eta_{ij}$  are thus dependent on both  $B_{\text{inc}}$  &  $I_{\text{inc}}$ , or  $I_{\text{inc}}$  &  $T_{\text{inc}}$ , respectively. Summarizing:

$$h = h_0 \begin{pmatrix} \frac{1}{B_{\text{inc}} I_{\text{inc}}} & \frac{B_{\text{inc}}}{I_{\text{inc}}} \\ \frac{I_{\text{inc}}}{B_{\text{inc}}} & B_{\text{inc}} I_{\text{inc}} \end{pmatrix}, \quad \eta = \eta_0 \begin{pmatrix} \frac{1}{I_{\text{inc}} T_{\text{inc}}} & \frac{I_{\text{inc}}}{T_{\text{inc}}} \\ \frac{T_{\text{inc}}}{I_{\text{inc}}} & I_{\text{inc}} T_{\text{inc}} \end{pmatrix}. \quad (9)$$

Finally, the links between predator-prey pairs in our modules are not only determined by the differences between the prey and/or predator traits. There may be important dynamical differences between a tightly linked food web (such as the BIT web shown in Figure 1), and two weakly coupled food chains. In the latter, the ratio between the strength of the “cross” links (e.g.  $B_1 \rightarrow I_2$ ) and the “parallel” links (e.g.  $B_1 \rightarrow I_1$ ) is determined by the cross link scaling parameter  $a_{\text{scale}}$ , such that a larger  $a_{\text{scale}}$  reduces the cross link strength as  $\Delta_B, \Delta_I, \Delta_T$  increase. For details see Appendix S1.

## Parameter selection

In order to capture a high diversity of dynamical outcomes, within a plausible ecological setting, the parameters of the food web were sampled uniformly from certain intervals determined by a standard value from which the boundaries are calculated (Table 1). In order to maximize the number of possible dynamical outcomes, the set of standard values was chosen such that two alternative stable states exist for the tritrophic linear chain (Ceulemans et al., 2019). The maximal growth rates ( $r'_0$ ,  $e/h_0$ , &  $e/\eta_0$ ) were set to correspond to an allometrically scaled food chain with the body mass ratios between adjacent trophic levels of  $10^3$ , with an allometric scaling exponent of  $-0.15$ . However, due to the spread of the intervals the actual ratio between body masses (assuming the same scaling exponent  $\lambda$ ) can vary between approximately 1 and 10,000,000 (for details, see Appendix S2).

The remaining parameters are given by  $e = 0.33$ ,  $\frac{c_N}{c_C} = 0.175$ , and any of the following:

$$\begin{aligned}\Delta_B &\in \{0, 0.25, 0.5, 0.75, 1\}, \\ \Delta_I &\in \{0, 0.25, 0.5, 0.75, 1\}, \\ \Delta_T &\in \{0, 0.25, 0.5, 0.75, 1\},\end{aligned}\tag{10}$$

so that there are 125 combinations possible. The values of the different  $\Delta_i$  determine both the specific food web topology and the amount of functional diversity present. For example,  $\Delta_B = 1$ ,  $\Delta_I = 0.25$ , and  $\Delta_T = 0$  implies that we are investigating the BI food web (Figure 1), where the basal level is highly diverse, but the species on the intermediate level are still relatively similar.

In order to sample a large part of all the possible dynamical outcomes that can be exhibited by our model, we randomly sampled 1024 different parameter combinations, for each selection of  $\Delta_B$ ,  $\Delta_I$ , and  $\Delta_T$  (Eq. 10). Moreover, for every parameter combination, 200 different initial conditions were tested to capture potential alternative stable states. These initial values were randomly sampled such that the total amount of biomass in the initial state did not exceed  $2 \cdot N_0$ . The system was allowed to relax to its attractor for  $10^5$  time units before the mean biomasses and the  $CV$  of each species, and of each trophic level, were recorded for  $3 \cdot 10^4$  time units. When *all* of the different species' means and  $CV$ s were sufficiently close to each other (absolute tolerance of 5 for the means, 0.01 for the  $CV$ s, and relative tolerance of 0.1), we assumed the initial conditions to relax to the same attractor and grouped them together. For each attractor found, we recorded the mean biomasses and  $CV$  of all species, as well as the  $CV$  of each trophic level as a whole. Numerical integration of the ordinary differential equations in Eq. (1) was done in  $C$  with the SUNDIALS CVODE solver version 2.7.0 (Hindmarsh et al., 2005). Subsequent analysis of the food web data was performed in Python 3.6 using NumPy (Van Der Walt et al., 2011), pandas (McKinney, 2010), and Matplotlib (Hunter, 2007). Further details on our computational procedure, as well as the code itself and the data required to produce Figures 3-6 and various Appendix Figures can be found as an electronic supplement.

## Random Forest Model

In order to simplify the presentation of our results, and to easily extract additional relevant information, we trained a Random Forest model on our dataset. A detailed description of how this works can be found in Appendix S3. Essentially, Random Forests

are a class of machine learning models which are popularly used due to their relatively simple structure and high versatility (Breiman, 2001; Cutler et al., 2007; Thomas et al., 2018).

For each quantity of interest (see Results), an Extremely Random Forest consisting of 2000 trees was trained and analyzed using the Scikit-learn (Pedregosa et al., 2011) and pdpbox packages in Python. The training dataset consisted of the 14 different parameters (see Table 1 and Eqs. 10) as input values, and the mean biomass and CVs of each trophic level as output values. During training, the random forest algorithm performed cross-validation by calculating the Out-Of-Bag (OOB) score, to estimate its accuracy. After training the random forest model, we used it to investigate how the basal, intermediate, and top diversity ( $\Delta_B$ ,  $\Delta_I$ , and  $\Delta_T$ ) affect the quantities of interest, independently of all other parameters, by examining the partial dependency graphs. Finally, the random forest also provided us with a measure of the importance of each of the input parameters in determining the desired outcome (relative importance).

## Results

Based on the data collected by simulating the dynamics of the different food webs (Figure 1) for 128,000 different parameter combinations, we investigated the following quantities using a Random Forest Model:

- nutrient density  $N$  and biomass per trophic level  $B_B, B_I, B_T$  (see Figure 3);
- CV of the nutrient density and biomass per trophic level  $CV_N, CV_B, CV_I, CV_T$  (see Figure 4); and
- top biomass production  $P_T$ , basal production efficiency  $(P/B)_B$ , amount of basal biomass flowing upward  $B_{up}$ , and food web efficiency  $P_T/P_B$  (Figure 5).

Figures 3-5 are partial dependence graphs revealing how trait differences on the basal ( $\Delta_B$ ), intermediate ( $\Delta_I$ ), and top ( $\Delta_T$ ) level affect the quantity of interest. Such partial dependence graphs are calculated from the Random Forest model trained on the food web data, and show the average value of the quantity of interest, independent of all other model parameters (see Methods). This presentation allows us to concisely capture the full behavior of all food webs, as they each occupy a certain location in the partial dependency graphs (Figure 2).

In most cases the OOB scores, which measure the accuracy of the Random Forest models, were above 0.60, with some exceptions (Table 2). Such scores indicate a sufficient model accuracy as we focus on the average trends in the predicted quantity as a function of the functional diversity at different trophic levels, rather than on predictions for specific parameter values.

The quantities of interest were only examined for those initial conditions and parameter combinations that actually led to coexistence of all species originally present (see Figure 1). Interestingly, there were only very few parameter combinations that led to coexistence for the T (1 combination) and BT (8 combinations) food webs (see Appendix S4). One of the two top species almost always outcompeted the other in these webs. As we cannot reliably investigate the behavior of these food webs in general, we did not include these parameter combinations in our dataset. This implies that our dataset contains no data points with  $\Delta_T > 0, \Delta_I = 0$ , and therefore the region below  $\Delta_I = 0.25$  for  $\Delta_T > 0$  in Figures 3-5 remains empty.



## Nutrient concentration and biomasses

The partial dependency graphs of the free nutrient concentration and the biomasses on each trophic level on the trait differences  $\Delta_B$ ,  $\Delta_I$ , and  $\Delta_T$  (Figure 3) reveal strong differences between the simple chain without any diversity ( $\Delta_B = \Delta_I = \Delta_T = 0$ ), and the food web with high trait differences at every trophic level ( $\Delta_B = \Delta_I = 1$ , and  $\Delta_T = \text{high}$ ). Comparing these two points shows that the linear chain has a higher average free nutrient concentration and a lower intermediate and top biomass than the diverse food web.

In between these two extremes, the tritrophic structure of our model gives rise to several interesting patterns. Comparing the chain and the B, I and BI food webs (i.e.  $\Delta_T = 0$ , Figure 3, left panels) shows that when  $\Delta_I$  is 0 or low, increasing  $\Delta_B$  leads to a decrease in basal biomass, whereas if  $\Delta_I$  is high, this pattern reverses as the basal biomass increases with  $\Delta_B$ . In other words, if functional diversity is only present on the basal level, basal biomass tends to decrease with  $\Delta_B$ . However, taking consumer diversity into consideration in the BI food web shows that this pattern is not general and strongly depends on the actual level of consumer diversity ( $\Delta_I$ ).

Investigating the effect of  $\Delta_I$  and  $\Delta_T$  on the intermediate and top level biomasses shows exactly the same pattern. When  $\Delta_T$  is 0, intermediate biomass tends to decrease as  $\Delta_I$  increases, whereas when  $\Delta_T$  is high, it increases with  $\Delta_I$  (independently of  $\Delta_B$ ). Additionally, it is clear that top biomass increases with  $\Delta_T$  in a gradual fashion.

The location and strength of trophic cascading in the food web is also affected by the amount of functional diversity present on the different trophic levels. For example, when  $\Delta_T$  is zero, an inverse relationship between the biomass on the intermediate and basal level can be observed, whereas the top level biomass seems hardly affected by  $\Delta_B$  and  $\Delta_I$  (Figure 3). When  $\Delta_T$  is low, biomasses at the top and intermediate level are strongly negatively correlated, indicating that a diverse top level is able to exert a stronger influence on the whole food web as compared to a non-diverse top level. This negative relationship does not cascade downwards to the basal level, potentially due to the buffering properties of a diverse intermediate level. However, for  $\Delta_T = \text{high}$ , the strong inverse relationship between top and intermediate biomass is replaced by a rather positive one, due to the sharp increase in intermediate biomass as  $\Delta_I$  is increased.

## Temporal variation

We also examined how the functional diversity at each trophic level ( $\Delta_B$ ,  $\Delta_I$ , and  $\Delta_T$ ) influences the temporal variation of the nutrients and biomasses per trophic level, by calculating the coefficient of variation ( $CV$ ) (Figure 4). One clear overarching pattern is the covariation of the  $CV$ s along the different trophic levels. Temporal fluctuations at any trophic level propagate through the whole food web, affecting all other levels.

The left column shows how  $\Delta_B$  and  $\Delta_I$  affect the  $CV$ s of the food webs without top diversity ( $\Delta_T = 0$ ). In this case, the  $CV$  of any trophic level depends almost solely on  $\Delta_I$ . Only the  $CV$  of the nutrient concentration depends strongly on  $\Delta_B$ .

These results are strongly affected by the top diversity. By increasing  $\Delta_T$  from 0 to *low*, all  $CV$ s are considerably dampened. However, this trend reverses as  $\Delta_T$  is increased further, as all  $CV$ s tend to increase again ( $\Delta_T = \text{high}$ ). Hence, while comparing the simple chain ( $\Delta_B = \Delta_I = \Delta_T = 0$ ) to the food web with high trait differences ( $\Delta_B = \Delta_I = 1$ , and  $\Delta_T = \text{high}$ ) does not immediately show any notable differences, it is clear that temporal variability is strongly affected in an intricate way by the amount of functional diversity at the different trophic levels.

Additionally, there is a strong correlation between the  $CV$  of the basal trophic level, and the mean free nutrient concentration (Figure 3, bottom row). A low temporal variability on the basal level leads to a strong increase in nutrient exploitation efficiency, and therefore low nutrient concentrations.

## Biomass production and food web energetics

We also analyzed metrics related to biomass production and food web energetics: top biomass production  $P_T$ , basal biomass flowing to the intermediate level  $B_{up}$ , basal biomass to production ratio  $(P/B)_B$ , and the food web efficiency  $P_T/P_B$  (Figure 5). Examining these (and related, see Appendix S5) quantities helped us to understand why the biomass at the top level is highest when functional diversity everywhere is high (top right corner in Figure 3 for  $\Delta_T = high$ ). Importantly, we can infer the quantities  $P_I$  (total biomass production of the intermediate level) and  $I_{up}$  (biomass flowing from the intermediate to the top level) from  $B_{up}$  and  $P_T$ :  $P_I = e \cdot B_{up}$ , and  $I_{up} = P_T/\varepsilon$  (see also Appendix S5).

The biomass production by the basal level  $P_B$  varies only little, as this quantity is completely determined by the interaction with the free nutrients (see Appendix S6). This property lies at the basis for explaining the increase in top biomass and food web efficiency as functional diversity increases everywhere.

When  $\Delta_T = 0$ , the absence of a diverse top trophic level creates a slight relative advantage for the fast growing species  $I_1$  (see Appendix Figure S7.1). Its effects on the basal level strongly depend on  $\Delta_I$ . For high  $\Delta_I$ , the fast growing  $B_1$  is heavily suppressed and the basal biomass is concentrated in  $B_2$ , which is less edible for the prominent  $I_1$ . For low  $\Delta_I$  (i.e.,  $I_1$  and  $I_2$  are functionally similar and less specialized), the dominant  $I_1$  can also graze significantly on the slow growing  $B_2$ , which strongly promotes the fast-growing  $B_1$ . The higher growth rate of  $B_1$  causes strong fluctuations of the basal biomass (Figure 4), which, in turn, leads to less efficient nutrient exploitation (Figure 3). Thus, for both low and high intermediate diversity, the basal level is unevenly exploited, which leads to a relatively high proportion of basal biomass being lost from the system, instead of being transferred up the food web (see also Appendix S5). The rather low basal biomass that is transferred to the intermediate level supports only a modest amount of intermediate biomass, and hence, a low biomass and biomass production on the top level, and a low food web efficiency.

In contrast, when the top level is highly diverse ( $\Delta_T = high$ ), the intermediate level is more evenly exploited, leading to a balanced presence of both intermediate species. In turn, this leads to an efficient exploitation of the basal level, especially when  $\Delta_I$  is also high, which is reflected by high values of  $(P/B)_B$  (Figure 5). Even though  $P_B$  remains roughly the same (Appendix Figure S5.2, and Appendix S6),  $B_{up}$  is increased (Figure 5) which leads to a significantly higher intermediate biomass and biomass production (Figures 3, S5.2), and, ultimately an increase in biomass on the top level. This increase subsequently explains the increase in food web efficiency through an increased top biomass production (Figure 5).

## Relative importance of parameters

The Random Forest model provides an estimate for the importance of each of the food web parameters in predicting the outcome (see Methods). Figure 6 shows them for the different biomasses and  $CV$ s for each of the 14 model parameters (for the relative



importance of the different production metrics, see Appendix Figure S5.4).

The parameters in each graph are grouped by their mean importance in descending order. For example, the Hill-exponent of the functional response describing the intermediate-top interaction ( $\nu$ ) has the highest mean relative importance for predicting the biomasses on each trophic level (Figure 6, top). In particular, it is very important for predicting the biomass on the top and intermediate level. On the other hand, the nutrient-uptake half saturation constant  $h_N$  is the least important.

One important observation in all three panels is that while the three possible trait differences  $\Delta_B, \Delta_I$ , and  $\Delta_T$  have a strong influence on all the different quantities we have investigated (see Figs. 3-5), they are never amongst the most important parameters. However, this is not very surprising given the nature of the other parameters in our model: for example, it is very natural that increasing the nutrient inflow concentration  $N_0$  has a very strong influence on species' biomasses.

Our results also show a balance between the relative importance of parameters affecting the external environment (such as the nutrient inflow rate  $N_0$  and the outflow rate  $\delta$ ), and internal parameters affecting the ecological dynamics within the food web (such as the handling times  $h_0, \eta_0$ , and Hill-exponents  $n, \nu$ ). Remarkably, parameters affecting the intermediate-top interaction ( $\nu, \eta_0, \alpha_0$ ) are of higher importance than their intermediate-basal analogues ( $n, h_0, \alpha_0$ ). In particular, the importance of the different diversity measures  $\Delta_T, \Delta_I, \Delta_B$  is ranked by trophic level. In this way, it is clear that food web parameters affecting the top level of are of highest importance.

## Discussion

The food web model analyzed in this manuscript was built with the aim of being as general as possible, while still being ecologically realistic. Given the expansive range of different environmental and ecological situations that are effectively covered by the model, we did not intend to answer research questions about specific environmental or ecological conditions. Rather, we focused on how the *average* behavior of tritrophic systems depends on the diversity on each trophic level separately. In particular, we studied how functional diversity in tritrophic food webs affects the biomass distributions, temporal variability, and production, on average. The partial dependence graphs provided by training a Random Forest model on our data served as ideal tools to answer these questions. Given the large amount of parameters that were randomly sampled, it is to be expected that the output data contains a large amount of variation. For example, parameters like the inflow nutrient concentration  $N_0$ , or the flow-through rate  $\delta$  naturally have a very strong influence on the trophic level biomasses and temporal variation. Partial dependence graphs revealed how the predicted outcome changes as a function of one particular parameter, *on average*, i.e., independently of all other model parameters.

## Motivating the generality of the model

In order to find out how the behavior of tritrophic systems typically depends on the diversity at each trophic level, it is important to build a model that is as general as possible. Adopting a trait-based rather than species-specific approach by analyzing functional diversity through trait differences, instead of using non-functional metrics of biodiversity such as species number, allows us to produce results of high generality (McGill et al., 2006; Hillebrand and Matthiessen, 2009; Krause et al., 2014).

Our model rests on few very general assumptions. The first is allometry, which states that larger organisms tend to grow slower than smaller ones (Kalinkat et al., 2013). Combined with the assumption that consumers tend to be larger than their prey we obtain the general property that the mean growth rate should decrease as the trophic level increases. This strictly holds for pelagic systems (Gaedke and Kamjunke, 2006), but also for other ones, except for the plant-herbivore interface (Brose et al., 2006). The third basic assumption is the frequently established trade-off between growth rate and defense (Hermes and Mattson, 1992; Hillebrand et al., 2000; Kneitel and Chase, 2004; Ehrlich et al., 2017). It implies that slow growing species are generally less affected by grazing than faster growing species, which invest less in defense mechanisms due to energetic limitations. In addition, the non-grazing mortality terms (see Eq. (8)) are of general nature and may be due to several different processes, such as basal respiration, the influence of parasites and viruses, or outflow in an experimental microcosm.

Based on this structure, we attempted to capture all possible dynamical outcomes by analyzing a large amount of potential parameter combinations and initial conditions. These parameter values were drawn from intervals geometrically centered around values which are particularly relevant for planktonic systems (Ceulemans et al., 2019), but are sufficiently wide to capture the behavior of many different types of food webs (see Table 1). Furthermore, the relatively simple and general structure of our food webs (see Figure 1) makes our results accessible for verification by experimental studies, as they are often limited in how much complexity can be included.

## Absence of coexistence in some webs

In two of the food webs we investigated, T and BT (see Figure 1), coexistence of all species was extremely rare (see Appendix S4). In almost every case, one of the two top species outcompeted by the other one, as expected when applying the competitive exclusion principle (Hardin, 1960; Klauschies and Gaedke, 2019). For less than 0.1% of parameter combinations, both top species still co-occurred at the end of the simulation time. The structure of these two food webs entails that the two top species are competing with each other for only one resource,  $I$ , with no other density dependent interaction.

In contrast, coexistence of all species is very likely in the I and IT food webs, even though the two intermediate species also share a single resource,  $B$ . This is due to an additional density dependent interaction acting on the intermediate species, by the presence of the top level (which may or may not be diverse). Therefore, more than one species can exist at the intermediate level without the necessity of fine-tuning their interaction parameters (Huntly, 1991; van Velzen, 2020).

Viewed in this way, it is clear that the amount of functional diversity at one trophic level can drastically influence that at other trophic levels: a loss of functional diversity at the intermediate level in the IT or BIT food webs leads to a loss of functional diversity at the top level as well. It is therefore crucial to safeguard functional diversity on lower trophic levels to enable a diverse top predator community.

## Relative parameter importance

The random forest model trained on the output data of our simulations (see Methods) provides information on which of the input parameters (see Table 1) are most important for estimating the predicted biomasses, CVs, and production metrics. In short, a param-

eter is of high importance when it tends to appear high up in many different trees in the forest. Conversely, when a parameter only appears near the end of the trees, it is of low importance in estimating the desired outcome. These relative importances are ranked from highest to lowest in Figure 6.

Remarkably, parameters directly affecting the top trophic level tend to be of high importance, whereas parameters influencing the nutrient uptake by the basal species are all situated near the bottom end. The different diversity indices  $\Delta_B$ ,  $\Delta_I$ , and  $\Delta_T$  are also ranked by trophic level. This hierarchy shows how important the higher trophic levels are in determining the biomass distributions, temporal variation of biomass dynamics, and energetics of whole food webs.

In addition to most of the parameters governing the properties of the top trophic level, the throughflow rate  $\delta$  and the nutrient inflow concentration  $N_0$  are also of high importance. As  $\delta$  determines the death rates of all the species in the model (see Eq. 8), and in particular those of the top level, it has a strong influence on the quantities we have investigated (Kath et al., 2018). The nutrient inflow concentration is unsurprisingly also of high importance in estimating these quantities. In particular, when  $N_0$  is high, the total biomass carrying capacity of our system is effectively increased, and vice-versa.

This analysis shows that the relative importance measures provided by the random forest model provide useful information to uncover the underlying mechanisms that govern the dynamics of more complex models. Our results clearly show how external and internal food web parameters do not overpower each other. Information on both types is required for accurately predicting biomasses, biomass variability and food web energetics.

## The complex relationships between diversity and ecosystem functioning

Our results show that functional diversity robustly increases biomass and production efficiency (Figure 5) at high trophic levels (Figure 3), and generally decreases temporal variation (Figure 4). In addition, we reveal intricate and complicated interactions between the degree of diversity at different trophic levels and these ecosystem functions. These interactions complicate comparison of the numerous studies on the links between diversity and functioning to each other (Filip et al., 2014; Wohlgemuth et al., 2017; Flöder et al., 2018; Daam et al., 2019).

For instance, our model shows that the effect of increasing producer diversity on the biomasses of each trophic level highly depends on the amount of functional diversity on the other trophic levels (Figure 3). When the top level is not functionally diverse ( $\Delta_T = 0$ ), the direction of the effect of  $\Delta_B$  on the basal biomass is determined by the amount of functional diversity on the intermediate level ( $\Delta_I$ ). When  $\Delta_I$  is low (low functional diversity), basal and intermediate biomass tend to decrease with increasing  $\Delta_B$ , whereas this trend reverses as  $\Delta_I$  becomes higher. A recent experimental study revealed that the effects of producer diversity on food web functioning also depend on the trait values on the consumer level in a bitrophic system (Wohlgemuth et al., 2017). Our results indicate that this interdependency is of a very general nature, and moreover, is expected to hold for higher trophic levels as well, which are less manageable in experimental settings. Indeed, our model shows a similar pattern when investigating the effect of  $\Delta_I$  and  $\Delta_T$  on the intermediate and top biomasses. Starting from  $\Delta_T = 0$ , increasing  $\Delta_I$  leads to a reduction in intermediate biomass, compared to an increase in intermediate biomass when  $\Delta_T$  is high. Our tritrophic food web comparison also shows that, when

functional diversity is increased everywhere, the biomass of the intermediate and top species increases significantly, whereas the basal biomass stays roughly constant. The same pattern was found in a modeling study comparing food webs of up to 100 animal species (Schneider et al., 2016). This correspondence gives credibility to considering the effects of biodiversity on food web functioning through changing the functional diversity in simpler food webs, instead of changing the species number which significantly increases food web complexity.

The effect of functional diversity on the temporal variability ( $CV$ ) of the biomasses at the different trophic levels also exhibited a complex dependency on the functional diversity of every single trophic level (Figure 4). One particularly robust result, however, is the non-monotonous relationship between top diversity ( $\Delta_T$ ) and the  $CV$  of any trophic level. When  $\Delta_T$  is increased from 0 to *low*, the  $CV$ s tended to strongly decrease. Such a reduction in the  $CV$  of a community as diversity increases has often been observed (Tilman, 1996), and can often be attributed to the presence of compensatory dynamical patterns (Gonzalez and Loreau, 2009; Bauer et al., 2014). However, as  $\Delta_T$  is increased further from *low* to *high*, the  $CV$  of each trophic level increased again. Hence, additional mechanisms governing the dynamics must also have a strong influence of the trophic level  $CV$ s. In Ceulemans et al. (2019), we observed a similar pattern in the trophic level  $CV$ s, which could be explained by the increased relevance of an additional dynamical timescale at high  $\Delta_T$ : the biomasses not only varied rapidly within predator-prey cycles, but also due to slower trait changes. As this slower timescale became more dominant, the  $CV$  increased again. Due to the similar model structure, this mechanism may be responsible for the increase in  $CV$  here as well. This result suggests that mechanisms for dampening community temporal variability established for simple but functionally diverse systems, such as compensatory dynamics arising from competition for a joint resource, may be counteracted by destabilizing effects in more complex—and thus more realistic—systems.

Examining how the functional composition at each trophic level and ecosystem functions are linked allows us to mechanistically understand why the biomass and biomass production on higher trophic levels is maximal when every trophic level is diverse, and why the diversity on the top level plays such a crucial role. This becomes particularly obvious when comparing the trends of the different metrics related to biomass production within the food web (see Results, Figure 5, and Appendix Figure S5.4).

A functionally diverse consumer community leads to an efficient exploitation of the production at the prey level (Gamfeldt et al., 2005). In our model, this mechanism is present between both the top and intermediate, as well as between the intermediate and basal level: a diverse top community efficiently exploits the intermediate production, which in turn results in the basal production being efficiently exploited. In contrast, when the top community is not functionally diverse, potentially functionally diverse intermediate and basal communities adjust in species composition so that they escape efficient predation. As a consequence, a higher proportion of the production is lost from the system rather than transferred up to the level above. In this way, the effects of functional diversity on different trophic levels synergize to make the food web with diversity everywhere the most efficient configuration in transferring biomass from the basal to the top level (Figure 5,  $P_T/P_B$ ).

The importance of considering multitrophic diversity has been emphasized before (Gamfeldt et al., 2005; Soliveres et al., 2016; Ceulemans et al., 2019). With these complex interactions between functional diversity on different trophic levels clearly exhibited

by our model, it is not surprising that studies focusing on a single food web structure or a single parametrization sometimes find incommensurable results. For example, increased primary producer diversity had often been linked to an increased producer biomass and production (Tilman et al., 1997; Cardinale et al., 2011). Our results show that this relationship not only depends on the trait values of the consumer level, as also found empirically by Wohlgemuth et al. (2017), but crucially also on the top level. Hence, we reveal considerable variation in the behavior of differently structured food webs with respect to the relationship between diversity and ecosystem functioning. Nevertheless, we are able to identify clear trends and uncover mechanisms governing the behavior of tritrophic systems, even when considering a large range of different parameter combinations.

## Concluding remarks

Understanding the link between functional diversity and the functioning of complex food webs is crucial to accurately predict how losses in functional diversity will affect the functions of natural food webs everywhere around us. Considerable detailed knowledge about this link has been gained in communities of one or two trophic levels. The present comparison of several different food webs consisting of three trophic levels (see Figure 1) reveals how the effects of functional diversity at any trophic level are intimately linked to the amount of functional diversity at other trophic levels. Our results reveal that at high functional diversity throughout the whole food web, functional shifts within the individual trophic levels result in a high food web efficiency and biomass on higher trophic levels, and a high degree of nutrient exploitation. Additionally, we show that the functional diversity on the top level is a strongly regulating factor for the biomass, temporal variability, and biomass production efficiency of any trophic level. Therefore, to prevent drastic reduction of important functions, as well as potentially irreversible transitions, it is of crucial importance to increase our efforts in conserving diversity of higher trophic levels, despite the often large operational problems involved.

## Acknowledgements

We thank Mridul Thomas for introducing us to using Random Forest Models on complex datasets, and to Toni Klauschies and Markus Stark for interesting discussions of our results. We would also like to thank Stefanie Moorthi, Sabine Flöder, and Laurie Wojcik for giving valuable feedback on an earlier version of the manuscript.

| Parameter          | Meaning                                | Range                                                            |
|--------------------|----------------------------------------|------------------------------------------------------------------|
| $N_0$              | nutrient inflow concentration          | $[1/2, 2] \cdot 1120 \mu g N/l$                                  |
| $h_N$              | nutrient uptake half-saturation const. | $[1/2, 2] \cdot 10 \mu g N/l$                                    |
| $r'_0$             | basal growth rate                      | $[1/2, 2] \cdot 1/\text{day}$                                    |
| $a_0$              | B-I attack rate                        | $[1/2, 2] \cdot 1.04 \cdot 10^{-3}/(\text{day} \cdot \mu g C/l)$ |
| $h_0$              | B-I handling time                      | $[1/2, 2] \cdot 1.15 \cdot \text{day}$                           |
| $\alpha_0$         | I-T attack rate                        | $[1/2, 2] \cdot 4.48 \cdot 10^{-4}/(\text{day} \cdot \mu g C/l)$ |
| $\eta_0$           | I-T handling time rate                 | $[1/2, 2] \cdot 2.62 \cdot \text{day}$                           |
| $\delta$           | outflow rate                           | $[0.03, 0.06] \cdot 1/\text{day}$                                |
| $a_{\text{scale}}$ | cross link scaling factor              | $[1, 500]$                                                       |
| $n$                | B-I Hill exponent                      | $[1, 2]$                                                         |
| $\eta$             | I-T Hill exponent                      | $[1, 2]$                                                         |

Table 1: Name and meaning of the parameters that were randomly varied in the study, along with the range from which they were sampled. For example, the nutrient inflow concentration  $N_0$  was randomly sampled from the interval  $[1/2, 2] \cdot 1120 \approx [560, 2240] \mu g N/l$ . In this table, B-I refers to the functional response between the Basal (B) and the Intermediate (I) trophic level, and I-T to the Intermediate and Top (T) level.



| Outcome variable     | OOB score |
|----------------------|-----------|
| Nutrient density     | 0.44      |
| Basal biomass        | 0.65      |
| Intermediate biomass | 0.92      |
| Top biomass          | 0.77      |
| Nutrient CV          | 0.26      |
| Basal CV             | 0.73      |
| Intermediate CV      | 0.68      |
| Top CV               | 0.70      |
| $P_T/P_B$            | 0.83      |
| $B_{up}$             | 0.86      |
| $(P/B)_B$            | 0.34      |
| $P_T$                | 0.78      |

Table 2: OOB scores estimating the accuracy of the random forest model, for all outcome quantities. An OOB score of 1 represents a perfect model prediction, whereas an OOB score of 0 means that the model is as accurate as simply predicting the mean outcome value every time.

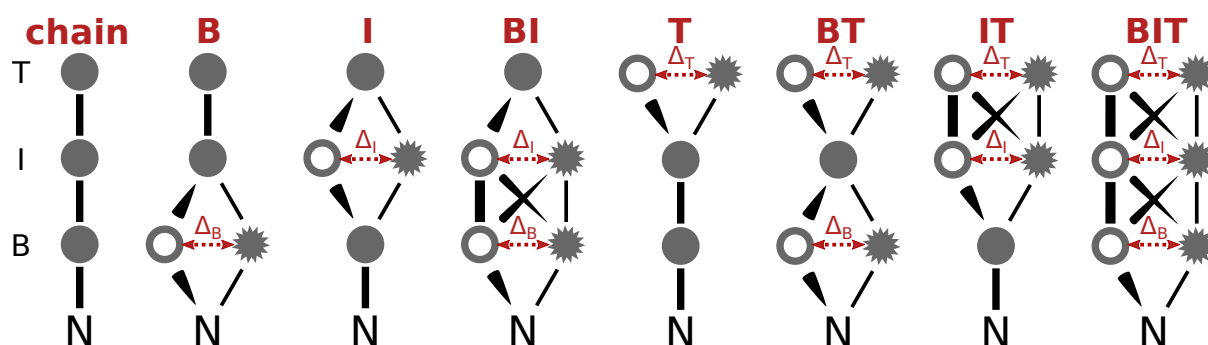

Figure 1: Schematic overview of the 8 different food webs compared in this study, which differ by the trophic levels (*B* for basal, *I* for intermediate, and *T* for top) on which diversity is possible (indicated above). In this way, **chain** refers to the linear chain which contains no diversity, **B** to the food web on which only the basal level is diverse, etc., and finally **BIT** denotes the food web which contains diversity on all trophic levels. The thickness of the connections between the nodes illustrates the comparative intensity of the trophic interaction, which is determined by the amount of diversity, or the trait difference, between the species on each trophic level ( $\Delta_B$ ,  $\Delta_I$ , and  $\Delta_T$ ). Each of these food webs are analyzed as general as possible, with varying amounts of trait differences and parameters drawn randomly from biologically plausible intervals.

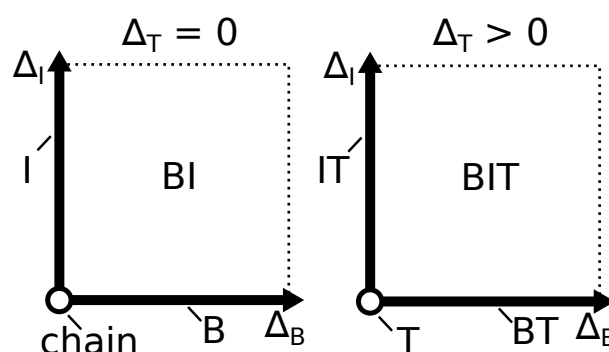

Figure 2: Pictorial representation of the location of the different food webs (Figure 1) in the partial dependence graphs in Figures 3-5. On the left-side graph ( $\Delta_T = 0$ , i.e., no diversity at the top level), the **chain** is on the point  $(0, 0)$  ( $\Delta_B = \Delta_I = 0$ ), the **B** food web is located on the line  $\Delta_I = 0$ , the **I** food web is located on the line  $\Delta_B = 0$ , and the **BI** web is located in the plane where both  $\Delta_B$  and  $\Delta_I$  are non-zero. Similarly, on the right-side graph where  $\Delta_T > 0$  (either *low* or *high* in Figs. 3-5), the **T** web is located on the point  $(0, 0)$  ( $\Delta_B = \Delta_I = 0$ ), the **BT** food web is located on the line  $\Delta_I = 0$ , the **IT** food web is located on the line  $\Delta_B = 0$ , and finally the **BIT** web is located in the plane where  $\Delta_B$ ,  $\Delta_I$ , and  $\Delta_T$  are non-zero.

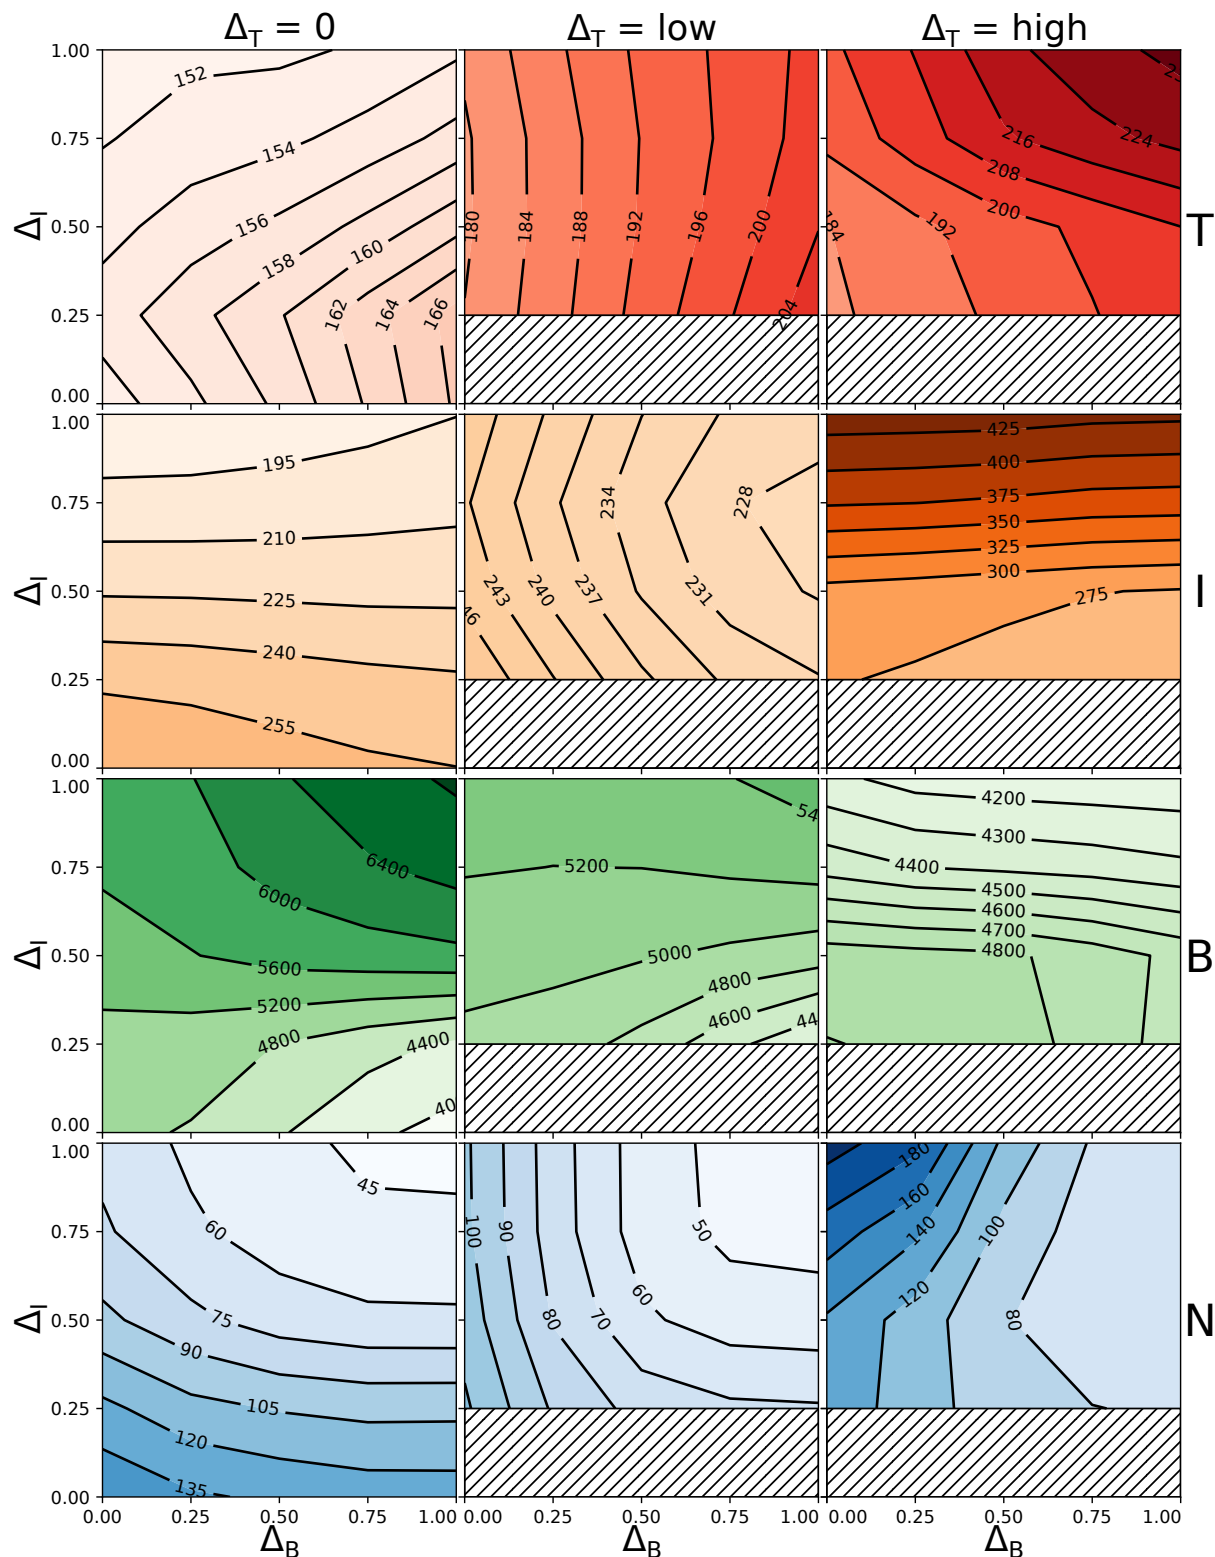

Figure 3: Partial dependence graphs of the trait differences  $\Delta_B$  and  $\Delta_I$ , for  $\Delta_T = 0$ , low  $\Delta_T$ , and high  $\Delta_T = 1$  (for more information see Methods), on the free nutrient concentration (blue), and the biomasses on the basal (green), intermediate (orange), and top (red) trophic levels. When  $\Delta_T$  is nonzero, the region below  $\Delta_I = 0.25$  (T and BT webs) cannot be shown as no coexisting parameter combination exists here due to the two distinct top species sharing only one resource. More information on the location of the different food webs in these graphs is given in Figure 2. To simplify the presentation trait differences on the top level ( $\Delta_T$ ) have been split into three groups:  $\Delta_T = 0$ ,  $\Delta_T = \text{low}$  (0.25 or 0.5), and  $\Delta_T = \text{high}$  (0.75 or 1).

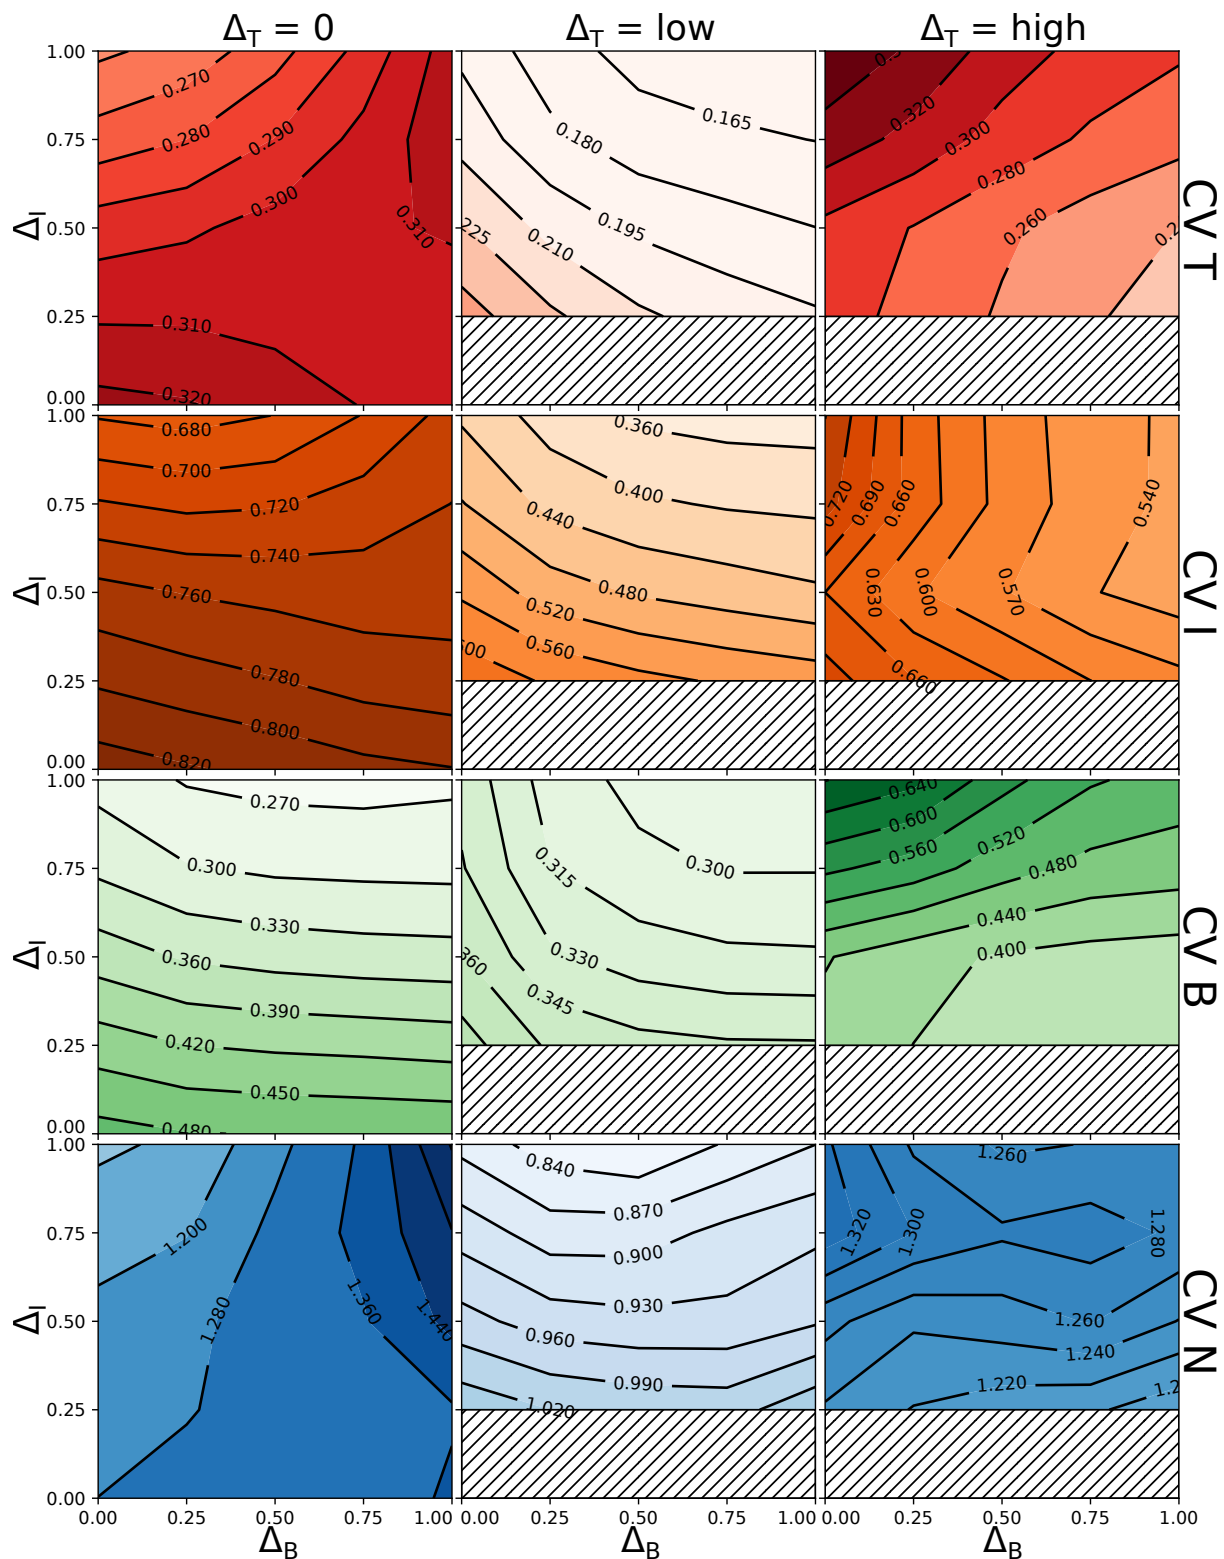

Figure 4: Partial dependence graphs of the trait differences  $\Delta_B$  and  $\Delta_I$ , for  $\Delta_T = 0$ , low  $\Delta_T$ , and high  $\Delta_T = 1$  (for more information see Methods), on the free nutrient coefficient of variation (CV) (blue), basal (green), intermediate (orange), and top (red) trophic levels. When  $\Delta_T$  is nonzero, the region below  $\Delta_I = 0.25$  (T and BT webs) cannot be shown as no coexisting parameter combination exists here due to the two distinct top species sharing only one resource. More information on the location of the different food webs in these graphs is given in Figure 2. To simplify the presentation trait differences on the top level ( $\Delta_T$ ) have been split into three groups:  $\Delta_T = 0$ ,  $\Delta_T = \text{low}$  (0.25 or 0.5), and  $\Delta_T = \text{high}$  (0.75 or 1).

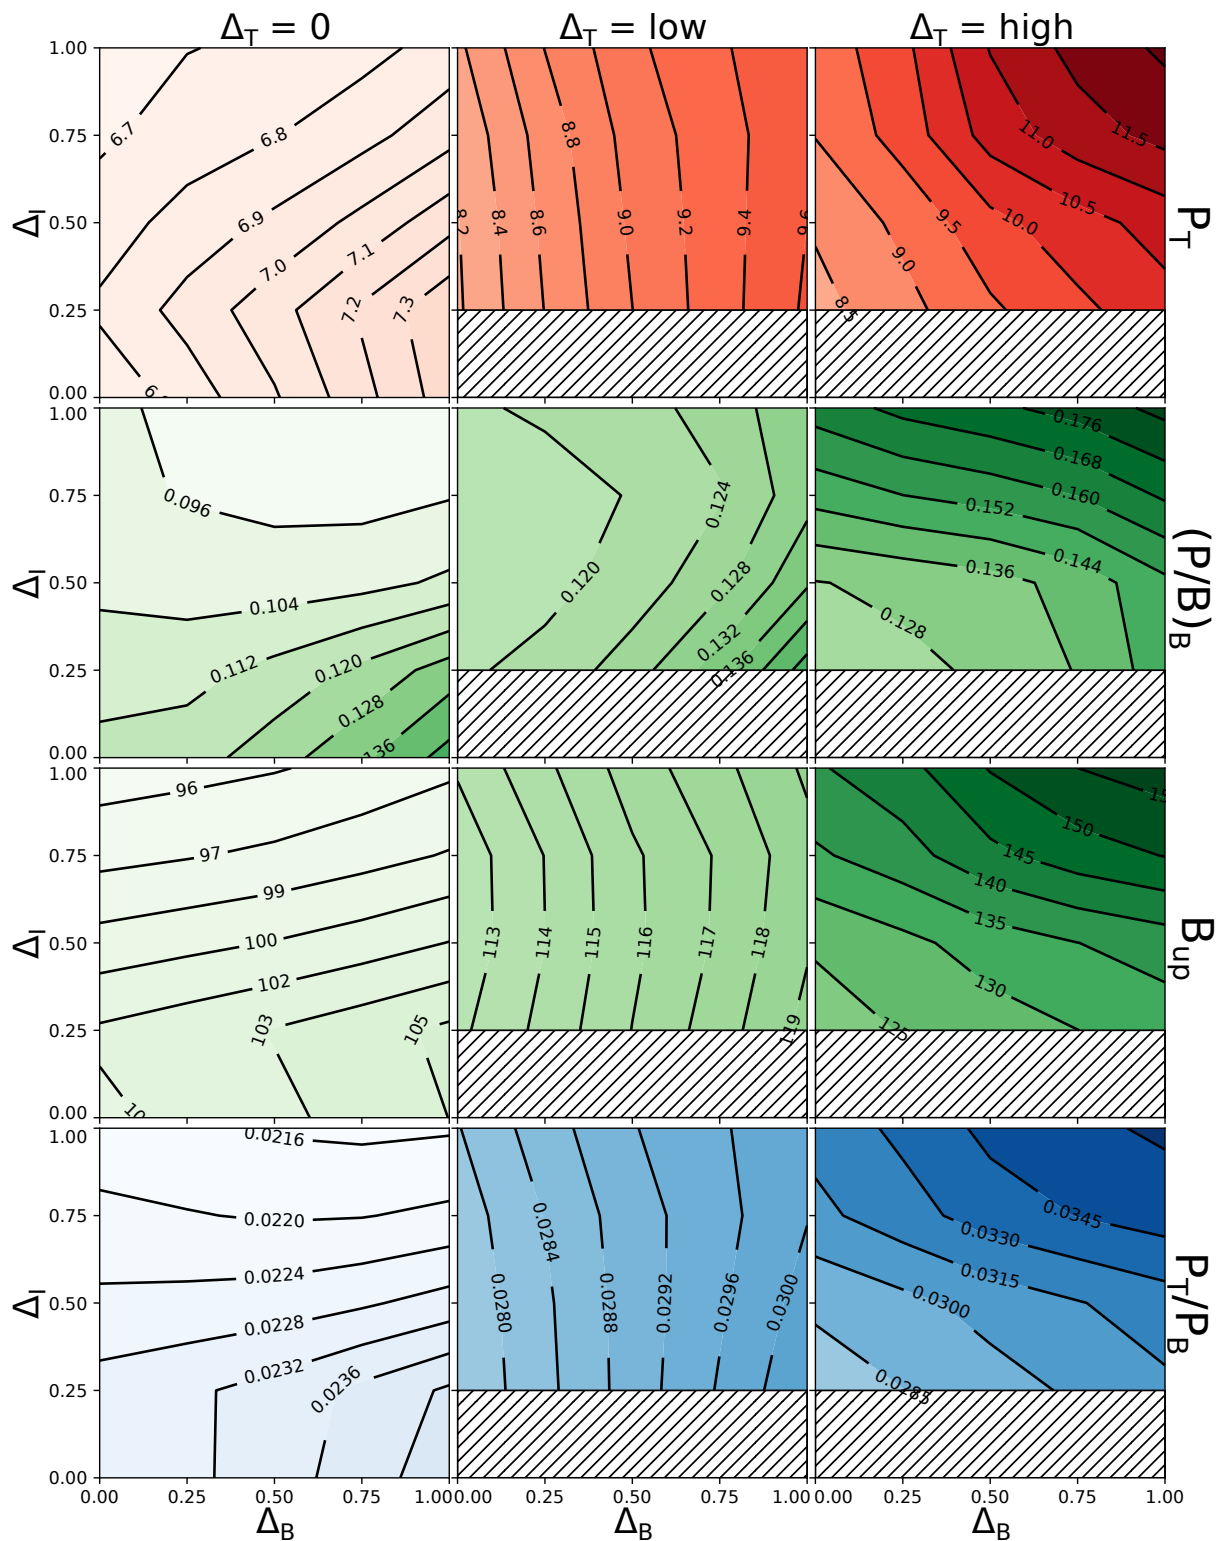

Figure 5: Partial dependence graphs of the trait differences  $\Delta_B$  and  $\Delta_I$ , for  $\Delta_T = 0$  (a),  $\Delta_T = 0.5$  (b), and  $\Delta_T = 1$  (c), on several different metrics related to biomass production (from top to bottom: top production, basal biomass flowing to  $I$ , basal production efficiency, and the food web efficiency) in the food webs. When  $\Delta_T$  is nonzero, the region below  $\Delta_I = 0.25$  (T and BT webs) cannot be shown as no coexisting parameter combination exists here due to the two distinct top species sharing only one resource. More information on the location of the different food webs in these graphs is given in Figure 2. To simplify the presentation trait differences on the top level ( $\Delta_T$ ) have been split into three groups:  $\Delta_T = 0$ ,  $\Delta_T = \text{low}$  (0.25 or 0.5), and  $\Delta_T = \text{high}$  (0.75 or 1).



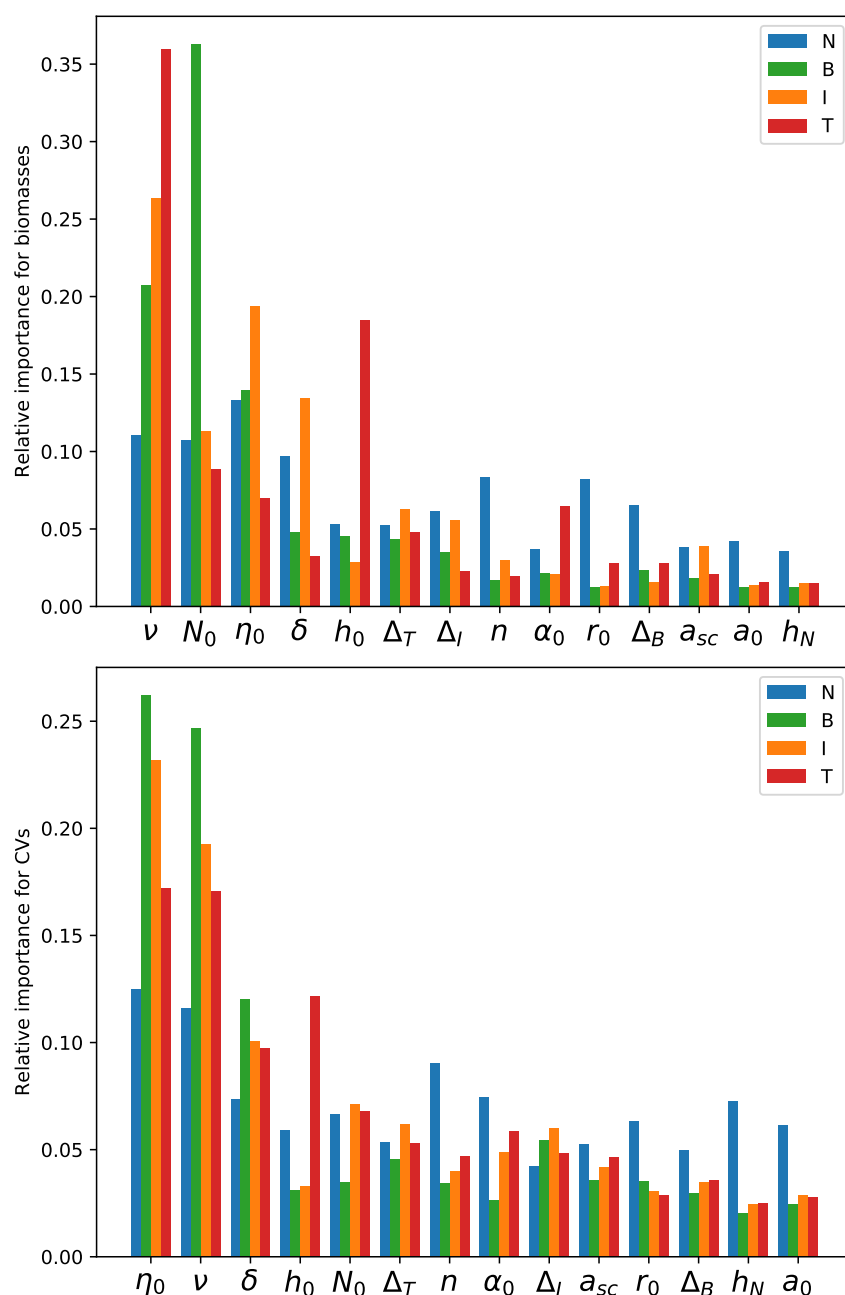

Figure 6: Relative importance of the different model parameters (see Table 1 on determining the biomasses and CVs of the different trophic levels). The relative importance quantifies how important the value of a certain parameter is to accurately predict the desired quantity, and they sum up to 1. The higher the relative importance of a parameter, the more relevant it is to make a prediction. In these graphs, the model parameters are ordered by their mean importance for each group of quantities (biomasses and CVs).

# References

- Abdala-Roberts, L., A. Puentes, D. L. Finke, R. J. Marquis, M. Montserrat, E. H. Poelman, S. Rasmann, A. Sentis, N. M. van Dam, G. Wimp, K. A. Mooney, and C. Björkman. 2019. Tri-trophic interactions: bridging species, communities and ecosystems. *Ecology Letters* doi:10.1111/ele.13392.
- Bauer, B., M. Vos, T. Klauschies, and U. Gaedke. 2014. Diversity, Functional Similarity, and Top-Down Control Drive Synchronization and the Reliability of Ecosystem Function. *The American Naturalist* 183:394–409. doi:10.1086/674906.
- Borer, E. T., E. W. Seabloom, and D. Tilman. 2012. Plant diversity controls arthropod biomass and temporal stability. *Ecology Letters* 15:1457–1464. doi:10.1111/ele.12006.
- Breiman, L. 2001. Random Forests. *Machine Learning* 45:5–32. doi:10.1017/CBO9781107415324.004.
- Brose, U., R. J. Williams, and N. D. Martinez. 2006. Allometric scaling enhances stability in complex food webs. *Ecology Letters* 9:1228–1236. doi:10.1111/j.1461-0248.2006.00978.x.
- Bruno, J. F., and M. I. O'Connor. 2005. Cascading effects of predator diversity and omnivory in a marine food web. *Ecology Letters* 8:1048–1056. doi:10.1111/j.1461-0248.2005.00808.x.
- Cardinale, B. J., K. L. Matulich, D. U. Hooper, J. E. Byrnes, E. Duffy, L. Gamfeldt, P. Balvanera, M. I. O'Connor, and A. Gonzalez. 2011. The functional role of producer diversity in ecosystems. *American Journal of Botany* 98:572–592. doi:10.3732/ajb.1000364.
- Ceulemans, R., U. Gaedke, T. Klauschies, and C. Guill. 2019. The effects of functional diversity on biomass production, variability, and resilience of ecosystem functions in a tritrophic system. *Scientific Reports* 9. doi:10.1038/s41598-019-43974-1.
- Cutler, D. R., T. C. Edwards, K. H. Beard, A. Cutler, T. Hess, J. Gibson, J. J. Lawler, D. R. Cutler, T. C. Edwards, K. H. Beard, A. Cutler, K. T. Hess, J. Gibson, and J. J. Lawler. 2007. Random Forests for Classification in Ecology. *Ecology* 88:2783–2792.
- Daam, M. A., H. Teixeira, A. I. Lillebø, and A. J. Nogueira. 2019. Establishing causal links between aquatic biodiversity and ecosystem functioning: Status and research needs. *Science of the Total Environment* 656:1145–1156. doi:10.1016/j.scitotenv.2018.11.413.
- Duffy, J. E., B. J. Cardinale, K. E. France, P. B. McIntyre, E. Thébault, and M. Loreau. 2007. The functional role of biodiversity in ecosystems: Incorporating trophic complexity. *Ecology Letters* 10:522–538. doi:10.1111/j.1461-0248.2007.01037.x.
- Ehrlich, E., and U. Gaedke. 2020. Coupled changes in traits and biomasses cascading through a tritrophic plankton food web. *Limnology and Oceanography* page lno.11466. doi:10.1002/lno.11466.
- Ehrlich, E., L. Becks, and U. Gaedke. 2017. Trait-fitness relationships determine how trade-off shapes affect species coexistence. *Ecology* 98:3188–3198. doi:10.1002/ecy.2047.

- Filip, J., B. Bauer, H. Hillebrand, A. Beniermann, U. Gaedke, and S. D. Moorthi. 2014. Multitrophic diversity effects depend on consumer specialization and species-specific growth and grazing rates. *Oikos* 123:912–922. doi:10.1111/oik.01219.
- Flöder, S., L. Bromann, and S. Moorthi. 2018. Inter- and intraspecific consumer trait variations determine consumer diversity effects in multispecies predator-prey systems. *Aquatic Microbial Ecology* 81:243–256. doi:10.3354/ame01866.
- Gaedke, U., and N. Kamjunke. 2006. Structural and functional properties of low- and high-diversity planktonic food webs. *Journal of Plankton Research* 28:707–718. doi:10.1093/plankt/fbl003.
- Gamfeldt, L., H. Hillebrand, and P. R. Jonsson. 2005. Species richness changes across two trophic levels simultaneously affect prey and consumer biomass. *Ecology Letters* 8:696–703. doi:10.1111/j.1461-0248.2005.00765.x.
- Gilman, S. E., M. C. Urban, J. Tewksbury, G. W. Gilchrist, and R. D. Holt. 2010. A framework for community interactions under climate change. *Trends in Ecology and Evolution* 25:325–331. doi:10.1016/j.tree.2010.03.002.
- Gonzalez, A., and M. Loreau. 2009. The Causes and Consequences of Compensatory Dynamics in Ecological Communities. *Annual Review of Ecology, Evolution, and Systematics* 40:393–414. doi:10.1146/annurev.ecolsys.39.110707.173349.
- Griffin, J. N., J. E. K. Byrnes, and B. J. Cardinale. 2013. Effects of predator richness on prey suppression: A meta-analysis. *Ecology* 94:2180–2187. doi:10.1890/13-0179.1.
- Hardin, G. 1960. The Competitive Exclusion Principle. *Science* 131:1292–1297. doi:10.1126/science.132.3419.95-a.
- Harms, D. A., and W. J. Mattson. 1992. The Dilemma of Plants : To Grow or Defend. *The Quarterly Review of Biology* 67:283–335. doi:10.1007/sll466-009-0028-z.
- Hillebrand, H., and B. Matthiessen. 2009. Biodiversity in a complex world: Consolidation and progress in functional biodiversity research. *Ecology Letters* 12:1405–1419. doi:10.1111/j.1461-0248.2009.01388.x.
- Hillebrand, H., B. Worm, and H. K. Lotze. 2000. Marine microbenthic community structure regulated by nitrogen loading and grazing pressure. *Marine Ecology Progress Series* 204:27–38.
- Hindmarsh, A. C., P. N. Brown, K. E. Grant, S. L. Lee, R. Serban, D. E. Shumaker, and C. S. Woodward. 2005. Sundials. *ACM Transactions on Mathematical Software* 31:363–396. doi:10.1145/1089014.1089020.
- Hooper, D. U., F. S. Chapin, J. J. Ewel, A. Hector, P. Inchausti, S. Lavorel, J. H. Lawton, D. M. Lodge, M. Loreau, S. Naeem, B. Schmid, H. Setälä, A. J. Symstad, J. Vandermeer, and D. A. Wardle. 2005. Effects of biodiversity on ecosystem functioning: A consensus of current knowledge. *Ecological Monographs* 75:3–35. doi:10.1890/04-0922.
- Hunter, J. D. 2007. Matplotlib: A 2D graphics environment. *Computing in Science and Engineering* 9:99–104. doi:10.1109/MCSE.2007.55.

- Huntly, N. 1991. Herbivores and the dynamics of communities and ecosystems. *Annual Review of Ecology and Systematics* 22:477–503. doi:10.1146/annurev.es.22.110191.002401.
- Kalinkat, G., F. D. Schneider, C. Digel, C. Guill, B. C. Rall, and U. Brose. 2013. Body masses, functional responses and predator-prey stability. *Ecology Letters* 16:1126–1134. doi:10.1111/ele.12147.
- Kath, N. J., A. Boit, C. Guill, and U. Gaedke. 2018. Accounting for activity respiration results in realistic trophic transfer efficiencies in allometric trophic network (ATN) models. *Theoretical Ecology* 11:453–463. doi:10.1007/s12080-018-0378-z.
- Klauschies, T., and U. Gaedke. 2019. Nutrient retention by predators undermines predator coexistence on one prey. *Theoretical Ecology* doi:10.1007/s12080-019-00440-y.
- Klauschies, T., D. A. Vasseur, and U. Gaedke. 2016. Trait adaptation promotes species coexistence in diverse predator and prey communities. *Ecology and Evolution* 6:4141–4159. doi:10.1002/ece3.2172.
- Kneitel, J. M., and J. M. Chase. 2004. Trade-offs in community ecology: Linking spatial scales and species coexistence. *Ecology Letters* 7:69–80. doi:10.1046/j.1461-0248.2003.00551.x.
- Kovach-Orr, C., and G. F. Fussmann. 2013. Evolutionary and plastic rescue in multitrophic model communities. *Philosophical Transactions of the Royal Society B: Biological Sciences* 368:20120084. doi:10.1098/rstb.2012.0084.
- Krause, S., X. Le Roux, P. A. Niklaus, P. M. van Bodegom, J. T. Lennon T., S. Bertilsson, H. P. Grossart, L. Philippot, and P. L. Bodelier. 2014. Trait-based approaches for understanding microbial biodiversity and ecosystem functioning. *Frontiers in Microbiology* 5:251. doi:10.3389/fmicb.2014.00251.
- McGill, B. J., B. J. Enquist, E. Weiher, and M. Westoby. 2006. Rebuilding community ecology from functional traits. *Trends in Ecology and Evolution* 21:178–185. doi:10.1016/j.tree.2006.02.002.
- McKinney, W. 2010. Data Structures for Statistical Computing in Python. *Proceedings of the 9th Python in Science Conference* 1697900:51–56.
- Pedregosa, F., G. Varoquaux, A. Gramfort, V. Michel, B. Thirion, O. Grisel, M. Blondel, P. Prettenhofer, R. Weiss, V. Dubourg, J. Vanderplas, A. Passos, D. Cournapeau, M. Brucher, M. Perrot, and É. Duchesnay. 2011. Scikit-learn: Machine learning in Python. *Journal of Machine Learning Research* 12:2825–2830.
- Petchey, O. L., and K. J. Gaston. 2006. Functional diversity: Back to basics and looking forward. *Ecology Letters* 9:741–758. doi:10.1111/j.1461-0248.2006.00924.x.
- Pimm, S. L., C. N. Jenkins, R. Abell, T. M. Brooks, J. L. Gittleman, L. N. Joppa, P. H. Raven, C. M. Roberts, and J. O. Sexton. 2014. The biodiversity of species and their rates of extinction, distribution, and protection. *Science* 344. doi:10.1126/science.1246752.

- Schneider, F. D., U. Brose, B. C. Rall, and C. Guill. 2016. Animal diversity and ecosystem functioning in dynamic food webs. *Nature Communications* 7:12718. doi:10.1038/ncomms12718.
- Soliveres, S., F. Van Der Plas, P. Manning, D. Prati, M. M. Gossner, S. C. Renner, F. Alt, H. Arndt, V. Baumgartner, J. Binkenstein, K. Birkhofer, S. Blaser, N. Blüthgen, S. Boch, S. Böhm, C. Börschig, F. Buscot, T. Diekötter, J. Heinze, N. Hölzel, K. Jung, V. H. Klaus, T. Kleinebecker, S. Klemmer, J. Krauss, M. Lange, E. K. Morris, J. Müller, Y. Oelmann, J. Overmann, E. Pašalić, M. C. Rillig, H. M. Schaefer, M. Schloter, B. Schmitt, I. Schöning, M. Schrumpf, J. Sikorski, S. A. Socher, E. F. Solly, I. Sonnemann, E. Sorkau, J. Steckel, I. Steffan-Dewenter, B. Stempfhuber, M. Tschapka, M. Türke, P. C. Venter, C. N. Weiner, W. W. Weisser, M. Werner, C. Westphal, W. Wilcke, V. Wolters, T. Wubet, S. Wurst, M. Fischer, and E. Allan. 2016. Biodiversity at multiple trophic levels is needed for ecosystem multifunctionality. *Nature* 536:456–459. doi:10.1038/nature19092.
- Thomas, M. K., S. Fontana, M. Reyes, M. Kehoe, and F. Pomati. 2018. The predictability of a lake phytoplankton community, over time-scales of hours to years. *Ecology Letters* 21:619–628. doi:10.1111/ele.12927.
- Tilman, D. 1996. Biodiversity: population versus ecosystem stability. *Ecology* 77:350–363. doi:10.2307/2265614.
- Tilman, D., C. L. Lehman, and K. T. Thomson. 1997. Plant diversity and ecosystem productivity: Theoretical considerations. *Proceedings of the National Academy of Sciences of the United States of America* 94:1857–1861. doi:10.1073/pnas.94.5.1857.
- Tilman, D., P. B. Reich, and J. M. H. Knops. 2006. Biodiversity and ecosystem stability in a decade-long grassland experiment. *Nature* 441:629–632. doi:10.1038/nature04742.
- Tirok, K., and U. Gaedke. 2010. Internally driven alternation of functional traits in a multispecies predator- prey system. *Ecology* 91:1748–1762. doi:10.1890/09-1052.1.
- Van Der Walt, S., S. C. Colbert, and G. Varoquaux. 2011. The NumPy array: A structure for efficient numerical computation. *Computing in Science and Engineering* 13:22–30. doi:10.1109/MCSE.2011.37.
- van Velzen, E. 2020. Predator coexistence through emergent fitness equalization. *Ecology* 0:1–10. doi:10.1002/ecy.2995.
- Wohlgemuth, D., J. Filip, H. Hillebrand, and S. D. Moorthi. 2017. Prey diversity effects on ecosystem functioning depend on consumer identity and prey composition. *Oecologia* 184:653–661. doi:10.1007/s00442-017-3892-6.
- Worm, B., E. B. Barbier, N. Beaumont, J. E. Duffy, C. Folke, B. S. Halpern, J. B. C. Jackson, H. K. Lotze, F. Micheli, S. R. Palumbi, E. Sala, K. A. Selkoe, J. J. Stachowicz, and R. Watson. 2006. Impacts of Biodiversity Loss on Ocean Ecosystem Services. *Science* 314:787–790. doi:10.1126/science.1132294.
